# Supplementary material for: The Role of Health Literacy in Postpartum Weight, Diet, and Physical Activity
Source: PubMed Central journal article supplement (PMC7465022; doi:10.3390/jcm9082463), 2020-08-01
Supplement: jcm-09-02463-s001.pdf [file jcm-09-02463-s001.pdf]

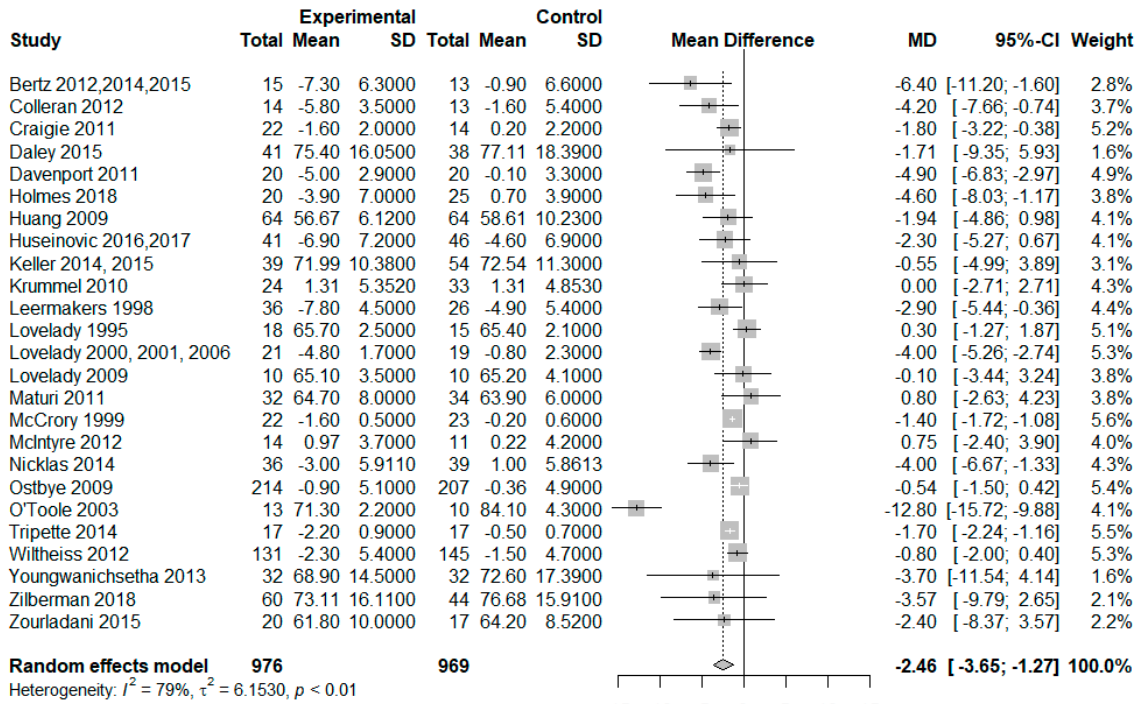

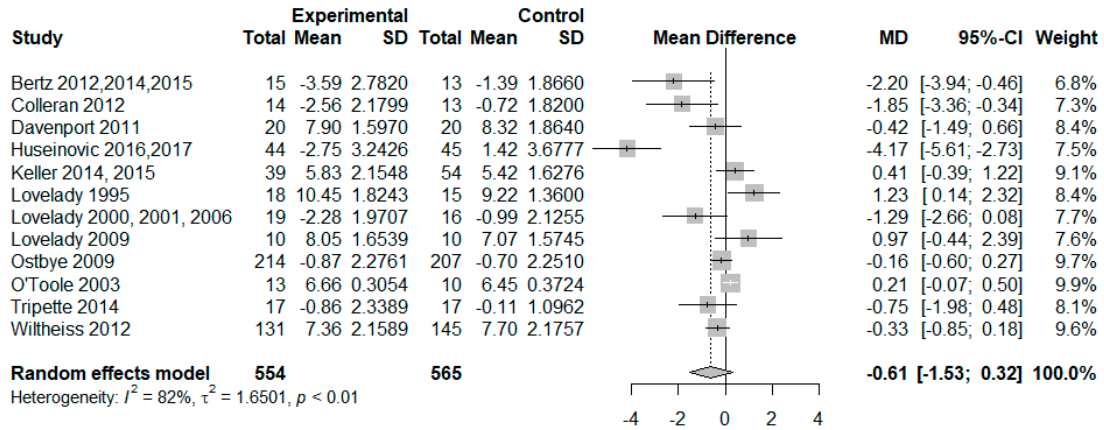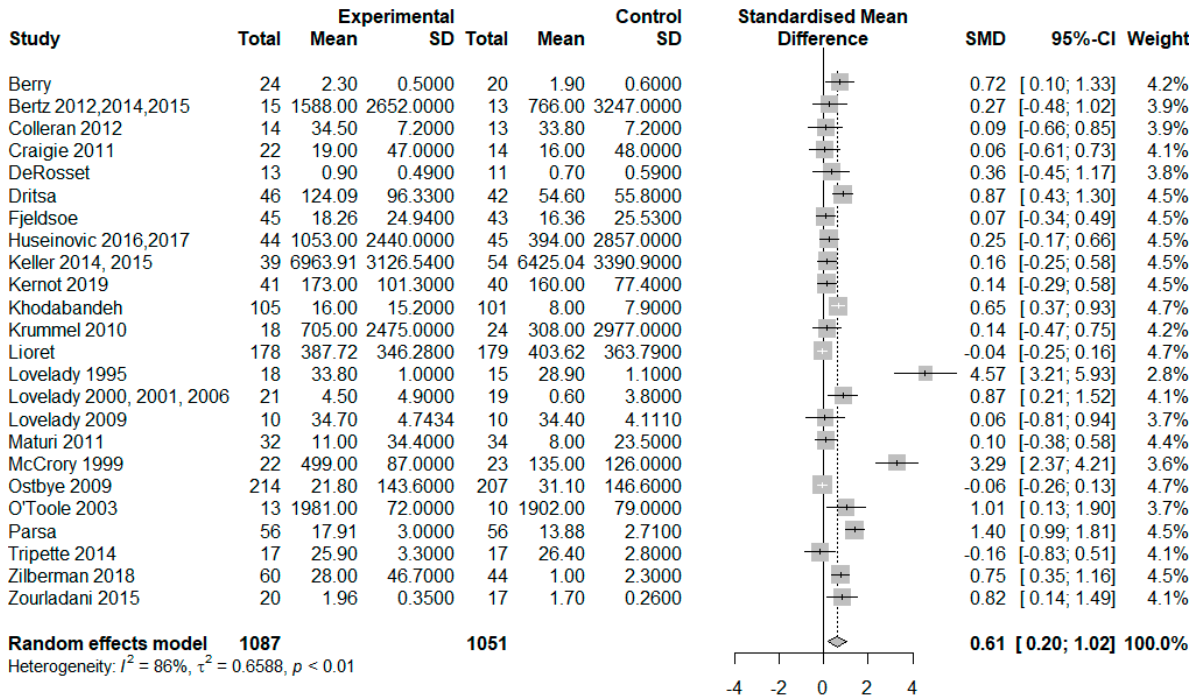

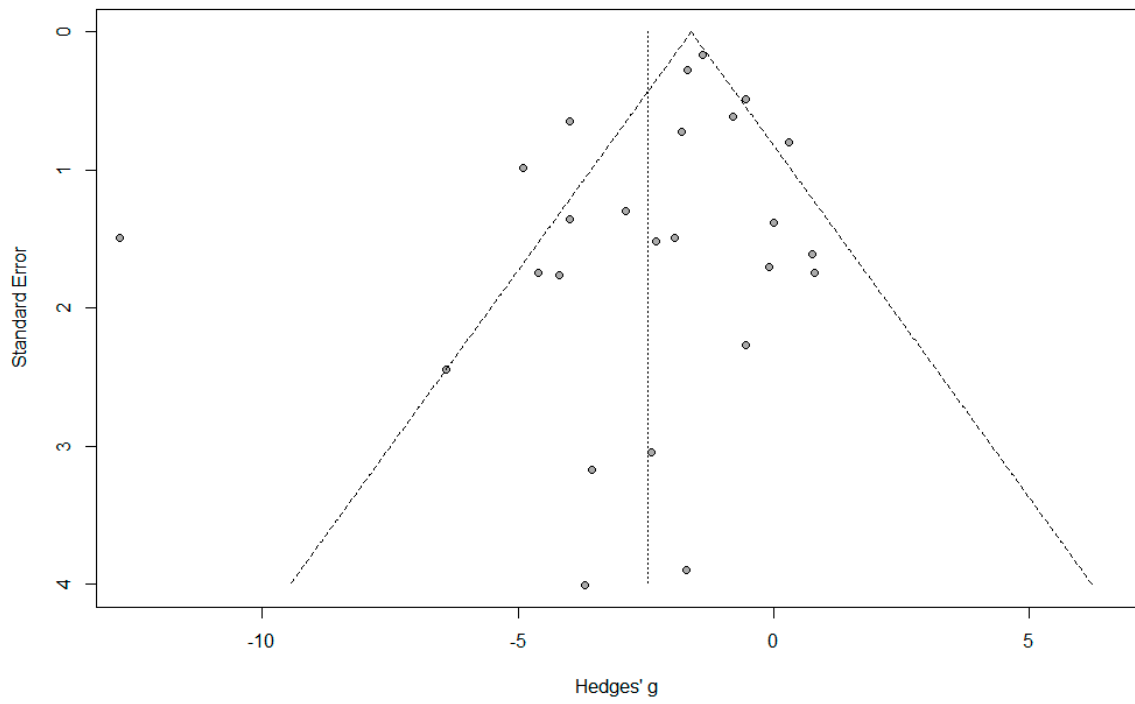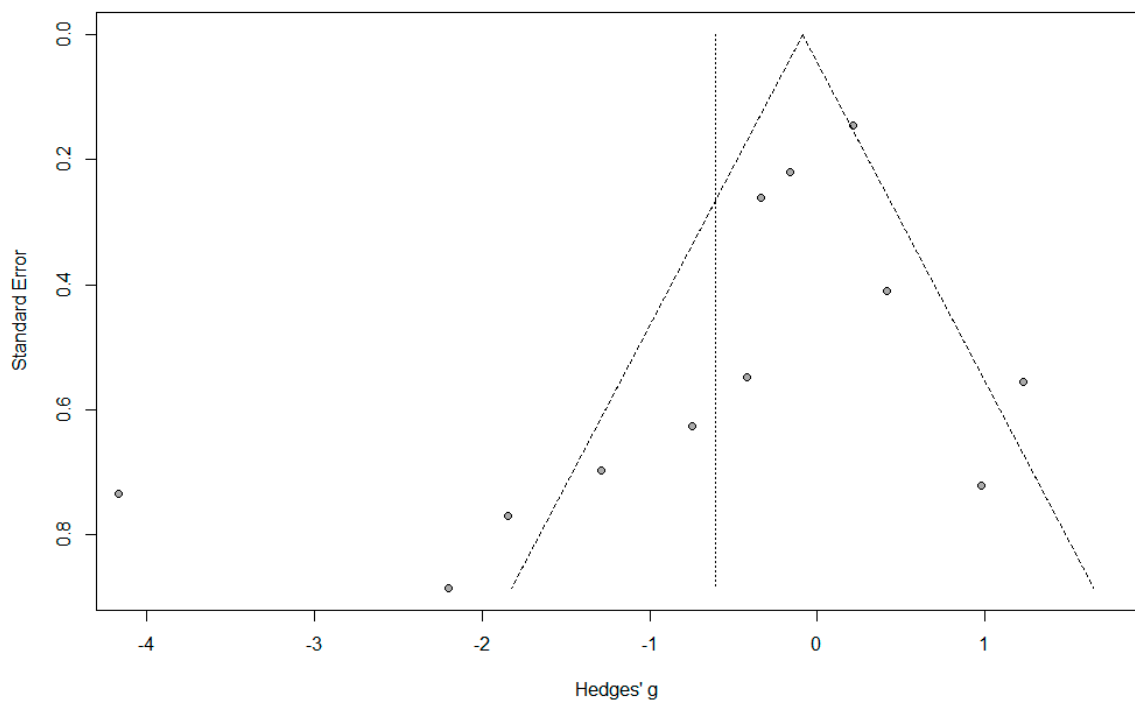

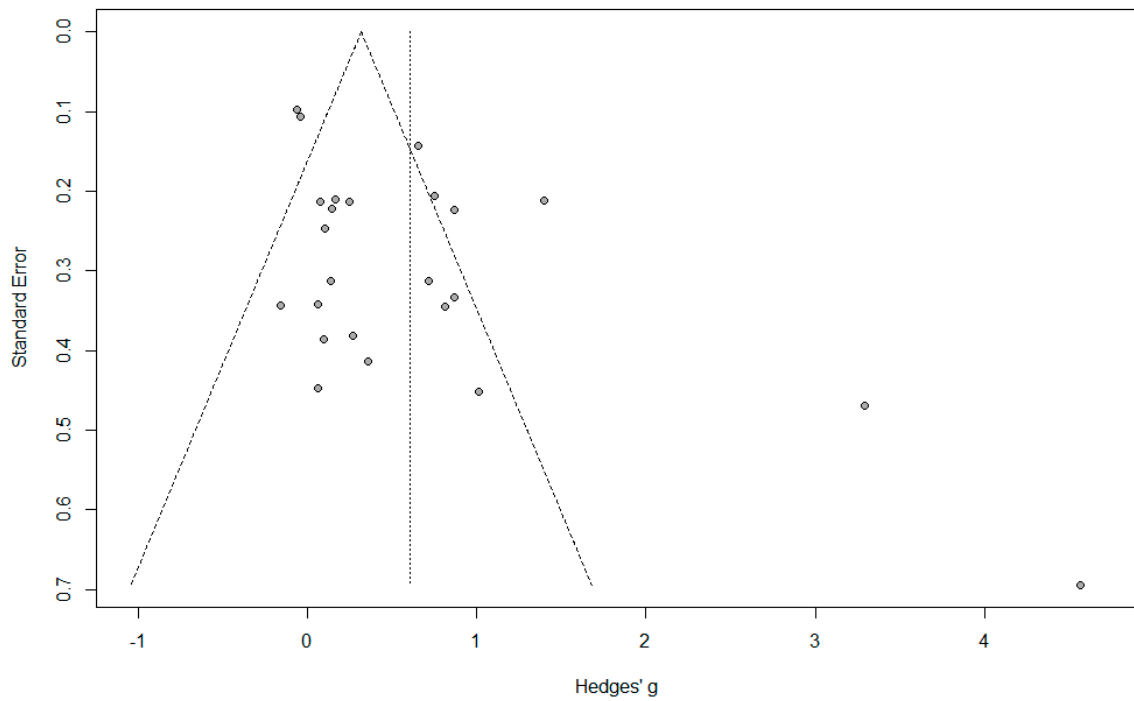

**Figure S1.** Forest plots and funnel plots for weight, energy intake and physical activity. (A) Forest plot for body weight. (B) Forest plot for energy intake. (C) Forest plot for physical activity. (D) Funnel plot for body weight. (E) Funnel plot for energy intake. (F) Funnel plot for physical activity.

**Table S1.** Search strategies.

## Medline

1. (MH "Postpartum Period+")
2. TI (postpartum OR post-partum OR postnatal OR post-natal OR puerperium OR postpartal OR post-partal OR lactating OR lactation OR "nursing women" OR breastfeeding OR breast-feeding OR "after birth" OR "following pregnancy" OR postpregnancy OR "post pregnancy" OR "following childbirth" OR "after delivery" OR "post childbirth") OR AB (postpartum OR post-partum OR postnatal OR post-natal OR puerperium OR postpartal OR post-partal OR lactating OR lactation OR "nursing women" OR breastfeeding OR breast-feeding OR "after birth" OR "following pregnancy" OR postpregnancy OR "post pregnancy" OR "following childbirth" OR "after delivery" OR "post childbirth")
3. 1 or 2
4. TI diet\* OR AB diet\*
5. TI (life\*style N2 (chang\* OR intervention\*)) OR AB (life\*style N2 (chang\* OR intervention\*))
6. TI ("physic\* activ\*" OR exercis\*) OR AB ("physic\* activ\*" OR exercis\*)
7. 4 or 5 or 6
8. 3 and 7
9. (MH "Randomized Controlled Trial+")
10. (MH "Clinical Trial+")
11. [randomi?ed controlled trial\\$.tw.](#)
12. [RCT.tw.](#)
13. [random allocation.tw.](#)
14. [randomly allocated.tw.](#)
15. [allocated randomly.tw.](#)
16. [\(allocated adj2 random\).tw.](#)
17. [or/9-16](#)
18. 8 and 17

Limit: Humans

## CINAHL

1. (MH "Postnatal Period+") OR (MH "Postnatal Care+")
2. TI (postpartum OR post-partum OR postnatal OR post-natal OR puerperium OR postpartal OR post-partal OR lactating OR lactation OR "nursing women" OR breastfeeding OR breast-feeding OR "after birth" OR "following pregnancy" OR postpregnancy OR "post pregnancy" OR "following childbirth" OR "after delivery" OR "post childbirth") OR AB (postpartum OR post-partum OR postnatal OR post-natal OR puerperium OR postpartal OR post-partal OR lactating OR lactation OR "nursing women" OR breastfeeding OR breast-feeding OR "after birth" OR "following pregnancy" OR postpregnancy OR "post pregnancy" OR "following childbirth" OR "after delivery" OR "post childbirth")

3. 1 or 2
4. TI diet\* OR AB diet\*
5. TI (life\*style N2 (chang\* OR intervention\*)) OR AB (life\*style N2 (chang\* OR intervention\*))
6. TI (“physic\* activ\*” OR exercis\*) OR AB (“physic\* activ\*” OR exercis\*)
7. 4 or 5 or 6
8. 3 and 7
9. [Clinical trial/](#)
10. [randomized controlled trials/](#)
11. [random allocation/](#)
12. [randomized controlled trial\\$.tw.](#)
13. [RCT.tw.](#)
14. [random allocation.tw.](#)
15. [randomly allocated.tw.](#)
16. [allocated randomly.tw.](#)
17. [\(allocated adj2 random\).tw.](#)
18. [or/9-17](#)
19. 8 and 18

## Pubmed

1. “postpartum period”[MH]
2. postpartum OR post-partum OR postnatal OR post-natal OR puerperium OR postpartal OR post-partal OR lactating OR lactation OR “nursing women” OR breastfeeding OR breast-feeding OR “after birth” OR “following pregnancy” OR postpregnancy OR “post pregnancy” OR “following childbirth” OR “after delivery” OR “post childbirth”[TIAB]
3. 1 or 2
4. diet\* [TIAB]
5. lifestyle AND (chang\* OR intervention\*) [TIAB]
6. physic\* activ\* OR exercis\* [TIAB]
7. 4 or 5 or 6
8. 3 and 7
9. [Clinical trial/](#)
10. [randomized controlled trials/](#)
11. [random allocation/](#)
12. [RCT.tw.](#)
13. [random allocation.tw.](#)
14. [randomly allocated.tw.](#)
15. [allocated randomly.tw.](#)
16. [or/9-15](#)
17. 8 and 16

Limit: Humans

### EBM reviews

1. Exp postpartum/
2. (postpartum OR post-partum OR postnatal OR post-natal OR puerperium OR postpartal OR post-partal OR lactating OR lactation OR "nursing women" OR breastfeeding OR breast-feeding OR "after birth" OR "following pregnancy" OR postpregnancy OR "post pregnancy" OR "following childbirth" OR "after delivery" OR "post childbirth").ti,ab.
3. 1 or 2
4. diet\*.ti,ab.
5. (life\*style ADJ2 (chang\* OR intervention\*)).ti,ab.
6. (physic\* activ\* OR exercis\*).ti,ab.
7. 4 or 5 or 6
8. 3 and 7
9. [Clinical trial/](#)
10. [randomized controlled trials/](#)
11. [random allocation/](#)
12. [randomi?ed controlled trial\\$.tw.](#)
13. [RCT.tw.](#)
14. [random allocation.tw.](#)
15. [randomly allocated.tw.](#)
16. [allocated randomly.tw.](#)
17. [\(allocated adj2 random\).tw.](#)
18. [or/9-17](#)
19. 8 and 18

### Cochrane Pregnancy and Childbirth Group.

1. MeSH descriptor: [Postpartum Period] explode all trees
2. (postpartum OR post-partum OR postnatal OR post-natal OR puerperium OR postpartal OR post-partal OR lactating OR lactation OR "nursing women" OR breastfeeding OR breast-feeding OR "after birth" OR "following pregnancy" OR postpregnancy OR "post pregnancy" OR "following childbirth" OR "after delivery" OR "post childbirth").(title, abs, keywords)
3. 1 or 2
4. diet\*. (title, abs, keywords)
5. life\*style AND (chang\* OR intervention\*) (title, abs, keywords)
6. (physic\* activ\* OR exercis\*). (title, abs, keywords)
7. 4 or 5 or 6
8. 3 and 7

9. MeSH descriptor: [Clinical Trial] explode all trees
10. MeSH descriptor: [Randomized Controlled Trial] explode all trees
11. MeSH descriptor: [Random Allocation] explode all trees
12. randomized controlled trial (all text)
13. RCT (all text)
14. random allocation ((all text)
15. randomly allocated (all text)
16. allocated randomly (all text)
17. or/9-16
18. 8 and 17
19. #18 AND SR-PREG

## Psycinfo

1. (postpartum OR post-partum OR postnatal OR post-natal OR puerperium OR postpartal OR post-partal OR lactating OR lactation OR "nursing women" OR breastfeeding OR breast-feeding OR "after birth" OR "following pregnancy" OR postpregnancy OR "post pregnancy" OR "following childbirth" OR "after delivery" OR "post childbirth").ti,ab
2. 1 or 2
3. diet\*.ti,ab.
4. (life\*style ADJ2 (chang\* OR intervention\*)).ti,ab.
5. ("physic\* activ\*" OR exercis\*).ti,ab.
6. 4 or 5 or 6
7. Clinical trial/
8. randomized controlled trials/
9. random allocation/
10. randomi?ed controlled trial\$.tw.
11. RCT.tw.
12. random [allocation.tw](#).
13. randomly [allocated.tw](#).
14. allocated [randomly.tw](#).
15. (allocated adj2 random).tw.
16. or/7-15
17. 6 and 16
18. Limit: Human

## Embase

1. 'puerperium'/exp



2. (postpartum OR post-partum OR postnatal OR post-natal OR puerperium OR postpartal OR post-partal OR lactating OR lactation OR "nursing women" OR breastfeeding OR breast-feeding OR "after birth" OR "following pregnancy" OR postpregnancy OR "post pregnancy" OR "following childbirth" OR "after delivery" OR "post childbirth"):ab,ti
3. 1 or 2
4. diet\*:ab,ti
5. (life\*style NEAR/2 (chang\* OR intervention\*)):ab,ti
6. ("physic\* activ\*" OR exercis\*):ab,ti
7. 4 or 5 or 6
8. 3 and 7
9. Clinical trial/
10. randomized controlled trials/
11. random allocation/
12. randomi?ed controlled trial\$.tw.
13. RCT.tw.
14. random [allocation.tw](#).
15. randomly [allocated.tw](#).
16. allocated [randomly.tw](#).
17. (allocated adj2 random).tw.
18. or/9-17
19. 8 and 18
20. Limit: Humans

**Table S2.** Inclusion and exclusion criteria of the systematic review and meta-analysis of lifestyle intervention in postpartum women.

|                           | <b>Participants (P)</b>                   | <b>Intervention (I)</b>                                                                                                                                                                                                                                                                                         | <b>Comparison (C)</b>                                                                                                                   | <b>Outcomes (O)</b>                                                                     | <b>Study type</b>                                                                                                                                                                                                                                    | <b>Limits</b>                                                                                 |
|---------------------------|-------------------------------------------|-----------------------------------------------------------------------------------------------------------------------------------------------------------------------------------------------------------------------------------------------------------------------------------------------------------------|-----------------------------------------------------------------------------------------------------------------------------------------|-----------------------------------------------------------------------------------------|------------------------------------------------------------------------------------------------------------------------------------------------------------------------------------------------------------------------------------------------------|-----------------------------------------------------------------------------------------------|
| <b>Inclusion Criteria</b> | Postpartum women (2 years post delivery). | Dietary, physical activity or behavioral interventions                                                                                                                                                                                                                                                          | Usual care, no intervention, or minimal intervention (single session at baseline)                                                       | Weight or weight change<br>Total energy intake or change<br>Physical activity or change | RCT                                                                                                                                                                                                                                                  | All languages<br>,<br>translation will be obtained whenever possible.<br>Not limited by year. |
| <b>Exclusion Criteria</b> | Pregnant women                            | Allergen avoidance studies, acute studies, supplement trials<br>Intervention that recruited during pregnancy<br>Exercise intervention focusing only on pelvic floor exercise, urinary incontinence<br>Intervention focusing only on initiating or increasing breastfeeding (without diet or exercise component) | Any dietary or physical activity intervention in the control arm that provides more contact than a single baseline information session. | Studies without relevant outcomes                                                       | Editorial, narrative review, conference abstract, letters, commentaries, uncontrolled trials, study protocol, non randomized controlled trials, studies with pregnant women will only be included if subgroup data is available for postpartum women |                                                                                               |

**Table S3.** Definition of Health Literacy Lifestyle Intervention Domains.

| Domain Name                                         | Included Domains from HLQ                                                                                                                                                                                                                                                                                   | Example                                                                                                                                                                                                                                                                                                                                                                              |
|-----------------------------------------------------|-------------------------------------------------------------------------------------------------------------------------------------------------------------------------------------------------------------------------------------------------------------------------------------------------------------|--------------------------------------------------------------------------------------------------------------------------------------------------------------------------------------------------------------------------------------------------------------------------------------------------------------------------------------------------------------------------------------|
| Interacting with healthcare professionals           | D6 - Ability to actively engage with healthcare providers (AE)                                                                                                                                                                                                                                              | <p>Example: a tool or intervention (practical) augments aids communication with HP</p> <ul style="list-style-type: none"> <li>• Permission to ask questions</li> <li>• Understanding roles of HPs</li> <li>• Language to ask questions</li> <li>• Understanding their own needs</li> <li>• Reluctance of HPs to discuss weight/lifestyle refer to student's thesis Alexis</li> </ul> |
| Access and utilisation of health care               | D7 - Navigating the healthcare system (NHS)                                                                                                                                                                                                                                                                 | <p>Access and utilization of health resources. (knowledge and limitation around having a child) Teach to use existing resources in the community. Linkages.</p> <p>Example: provide advice or resource list on where to seek help to manage weight and lifestyle, can include community resources</p>                                                                                |
| Self-care: skills and knowledge                     | <p>D3 - Actively managing my health (AMH)</p> <p>D2 - Having sufficient information to manage my health (HSI)</p> <p>D5 - Appraisal of health information (CA)</p> <p>D8 - Ability to find good health information (FHI)</p> <p>D9 - Understand health information well enough to know what to do (UHI)</p> | <p>Example: goal setting, self-monitoring, meal or exercise plans, relapse coping, stress coping, cognitive behavioural therapy, specific time, intensity, duration of exercise</p> <p>Example: Provide instruction on how to perform behaviour/diet/exercise, demonstration, onsite sessions</p>                                                                                    |
| Social support or enabler                           | D4 - Social support for health (SS)                                                                                                                                                                                                                                                                         | <p>Example: social circle/peer, natural social circle including leveraging social relations enabling her health/purposeful interaction. Intentional/explicit/not-incident. Social support as a resource to manage health.</p> <p>Example: family based/partners</p> <ul style="list-style-type: none"> <li>• Lack of intentional social support</li> </ul>                           |
| Participating in health debates and decision-making | Not in HLQ                                                                                                                                                                                                                                                                                                  | <p>Example: Involve in the development of implementation of the intervention/co-design</p>                                                                                                                                                                                                                                                                                           |

Table S4. Risk of bias of included studies \*.

| Author           | Randomisation Process | Deviations from Intended Interventions | Missing Outcome Data | Measurement of the Outcome | Selection of the Reported Result | Overall Bias |
|------------------|-----------------------|----------------------------------------|----------------------|----------------------------|----------------------------------|--------------|
| Berry 2015       | Low                   | High                                   | Low                  | High                       | Low                              | High         |
| Bertz 2015       | Low                   | High                                   | Low                  | Low                        | Low                              | High         |
| Colleran 2012    | Low                   | High                                   | Low                  | High                       | Low                              | High         |
| Craigie 2011     | Low                   | High                                   | Low                  | Low                        | Low                              | High         |
| Davenport 2011   | Some concerns         | High                                   | Low                  | High                       | Low                              | High         |
| deRosset 2013    | Low                   | High                                   | Some concerns        | High                       | Low                              | High         |
| Dritsa 2009      | Some concerns         | High                                   | Some concerns        | High                       | Low                              | High         |
| Fjeldsoe 2010    | Low                   | High                                   | Low                  | High                       | Low                              | High         |
| Holmes 2018      | Low                   | High                                   | High                 | High                       | Low                              | High         |
| Huang 2011       | Some concerns         | High                                   | Low                  | High                       | Low                              | High         |
| Huseinovic 2016  | Low                   | High                                   | Low                  | High                       | Low                              | High         |
| Keller 2014      | Some concerns         | High                                   | High                 | Low                        | Low                              | High         |
| Kernot 2019      | Low                   | High                                   | Some concerns        | High                       | High                             | High         |
| Khodabandeh 2017 | Low                   | High                                   | Low                  | High                       | Low                              | High         |
| Krummel 2010     | Some concerns         | High                                   | Low                  | High                       | Low                              | High         |
| Leermakers 1998  | Some concerns         | High                                   | Low                  | High                       | Low                              | High         |
| Lioret 2012      | Low                   | High                                   | Low                  | High                       | Low                              | High         |
| Lovelady 2000    | Some concerns         | High                                   | High                 | Low                        | Low                              | High         |
| Lovelady 1995    | Some concerns         | High                                   | Low                  | Low                        | Low                              | High         |
| Lovelady 2009    | Some concerns         | High                                   | Low                  | High                       | Low                              | High         |
| Maturi 2011      | Low                   | High                                   | Low                  | High                       | Low                              | High         |
| McCrory 1999     | Low                   | High                                   | Low                  | High                       | Low                              | High         |
| McIntyre 2012    | Some concerns         | High                                   | Low                  | High                       | Low                              | High         |
| Nicklas 2014     | Low                   | Low                                    | Low                  | Low                        | Low                              | Low          |

|                              |                  |               |                  |                  |      |      |
|------------------------------|------------------|---------------|------------------|------------------|------|------|
| Ostbye<br>2009               | Some<br>concerns | High          | Low              | High             | Low  | High |
| O'Toole<br>2003              | Low              | High          | Low              | High             | Low  | High |
| Parsa 2017                   | Low              | High          | Low              | High             | Low  | High |
| Tripette<br>2014             | Some<br>concerns | Some concerns | Low              | High             | Low  | High |
| Wiltheiss<br>2013            | Low              | High          | Some<br>concerns | High             | Low  | High |
| Youngwa<br>nichsetha<br>2013 | Low              | High          | Low              | Low              | Low  | High |
| Zilberman<br>2018            | Some<br>concerns | High          | Some<br>concerns | Some<br>concerns | High | High |
| Zourdala<br>ni 2015          | Low              | High          | Low              | Low              | Low  | High |

\* Based on the Revised Cochrane risk of bias tool for randomized trials (RoB 2).

**Table S5.** Characteristics of included studies.

| <b>Study; Sample Size</b> | <b>Country</b> | <b>Postpartum Age; Postpartum Population</b>                         | <b>Intervention Type; Delivery Format</b> | <b>Intervention Provider; Intervention Location</b>          | <b>Duration; Number of Sessions</b>                |
|---------------------------|----------------|----------------------------------------------------------------------|-------------------------------------------|--------------------------------------------------------------|----------------------------------------------------|
| Armstrong 2003<br>N = 20  | Australia      | 6 weeks - 12 months postpartum<br>EPDS of $\geq 12$                  | Exercise Group                            | Dietitian<br>Outdoor and school hall                         | 12 weeks<br>In-person: 36                          |
| Berry 2015<br>N = 60      | USA            | At least 6 weeks postpartum<br>BMI > 25 kg/m <sup>2</sup>            | Diet and exercise Group and individual    | Health education interventionist<br>Health clinics and home  | 6 months<br>In-person: 15                          |
| Bertz 2015<br>N = 68      | Sweden         | 10-14 weeks postpartum<br>Prepregnancy BMI 25 – 35 kg/m <sup>2</sup> | Diet and exercise Individual              | Dietitian and physical therapist<br>Clinic, home and outdoor | 12 weeks<br>In-person: 4;<br>SMS: 24               |
| Colleran 2012<br>N = 31   | USA            | 4 weeks postpartum<br>BMI 25 to 30 kg/m <sup>2</sup>                 | Diet and exercise Individual              | Research assistants and dietitians<br>Home                   | 16 weeks<br>Session number could not be determined |
| Craigie 2011<br>N = 52    | UK             | 6 - 18 months postpartum<br>BMI > 25 kg/m <sup>2</sup>               | Diet and exercise Individual              | A trained lifestyle counsellor<br>Home                       | 12 weeks<br>In-person: 3;<br>Phone: 3              |
| Daley 2015<br>N = 94      | UK             | Within 6 months postpartum<br>Depression according to                | Exercise Individual                       | Physical Activity Facilitator<br>Home                        | 6 months<br>In-person: 2;<br>Phone: 2              |

|                              |           | ICD-10 and<br>EPDS                                                                                                          |                                                  |                                                                |                                           |
|------------------------------|-----------|-----------------------------------------------------------------------------------------------------------------------------|--------------------------------------------------|----------------------------------------------------------------|-------------------------------------------|
| Davenport 2011<br>N = 47     | Canada    | 7 - 9 weeks<br>postpartum<br>BMI $\geq$ 25.0<br>kg/m <sup>2</sup> and/or<br>had retained<br>$\geq$ 5.0 kg from<br>pregnancy | Diet and<br>exercise<br>Group and<br>individual  | Study investigator and registered dietitian<br>Centre and home | 16 weeks<br>48-64 walking<br>sessions     |
| deRosset 2013<br>N = 24      | USA       | 6 weeks<br>postpartum<br>Overweight or<br>obese by self-<br>report according<br>to prepregnancy<br>BMI                      | Diet and<br>exercise<br>Group                    | Not reported<br>Clinic, community and home                     | 12 weeks<br>In-person: 12                 |
| Dritsa 2009<br>N = 88        | Canada    | 4 - 38 weeks<br>postpartum<br>EPDS $\geq$ 10                                                                                | Exercise<br>Individual                           | Exercise physiologist<br>Home                                  | 12 weeks<br>In-person: 4                  |
| Fjeldsoe 2010<br>N = 88      | Australia | Less than 12<br>months<br>postpartum<br>General<br>population                                                               | Exercise<br>Individual                           | Behavioural counsellor<br>Centre or home and community         | 12 weeks<br>In-person: 2;<br>SMS: 47 - 71 |
| Haire-Joshu 2015<br>N = 1325 | USA       | Less than 1 year<br>post-partum<br>General<br>population                                                                    | Diet and<br>exercise<br>Group and<br>individual  | Parent educators<br>Home and school                            | 12 months<br>In-person: 10<br>plus online |
| Holmes et al. 2018           | USA       | 24 weeks<br>postpartum                                                                                                      | Edu program,<br>weight<br>management<br>program, | Weight loss centre<br>Phone/text                               | 3 months                                  |

|                             |        |                                                                                  |                                                    |                                                 |                                                             |
|-----------------------------|--------|----------------------------------------------------------------------------------|----------------------------------------------------|-------------------------------------------------|-------------------------------------------------------------|
|                             |        | Postnatal<br>overweight with<br>PH of GDM                                        | weight<br>monitoring, tele<br>and text<br>support. |                                                 |                                                             |
| Huang 2009<br>N = 240       | Taiwan | 24-48 h - 6<br>months<br>postpartum<br>General<br>population                     | Diet and<br>exercise<br>Individual                 | Nurse<br>Hospital and clinic                    | 6 months<br>In-person: 3                                    |
| Huseinovic 2016<br>N = 110  | Sweden | 6 - 15 weeks<br>postpartum<br>BMI $\geq 27$ kg/m <sup>2</sup>                    | Diet<br>Individual                                 | Dietitians<br>Home                              | 12 weeks<br>In-person: 1;<br>Text message:<br>12; Phone: 12 |
| Keller 2014<br>N = 139      | USA    | 6 weeks - less<br>than 6 months<br>postpartum<br>BMI $\geq 25$ kg/m <sup>2</sup> | Exercise<br>Group                                  | Community health worker<br>Outdoor              | 12 months<br>In-person: 52                                  |
| Kernot et al. 2019          | Aust   | 6 week- 6 month<br>postpartum<br>Postpartum<br>(facebook)                        | Exercise<br>Group (virtual)                        | Electronic messaging via app<br>Home            | 6 weeks<br>Weekly<br>emails                                 |
| Khodabandeh 2017<br>N = 220 | Iran   | Day of<br>discharge<br>postpartum<br>General<br>population                       | Diet and<br>exercise<br>Individual                 | Researcher<br>Hospital and home                 | 6 weeks<br>In-person: 2;<br>Text message:<br>~ 8            |
| Krummel 2010<br>N = 151     | USA    | Up to 2 years<br>postpartum<br>General<br>population                             | Diet and<br>exercise<br>Group and<br>individual    | Trained facilitators<br>Centre and home         | 12 months<br>In-person: 11                                  |
| Lee 2016<br>N = 65          | UK     | 6 weeks - 1 year<br>postpartum                                                   | Exercise                                           | Health psychologist<br>Local university or home | 3 months<br>In-person: 12                                   |



|                           |           | General population                                                               | Group and individual                      |                                                      |                                                            |
|---------------------------|-----------|----------------------------------------------------------------------------------|-------------------------------------------|------------------------------------------------------|------------------------------------------------------------|
| Leermakers 1998<br>N = 90 | USA       | 3 - 12 months postpartum<br>Exceed their pre-pregnancy weight by at least 6.8 kg | Diet and exercise<br>Group and individual | Not reported<br>Centre and home                      | 6 months<br>In-person: 2;<br>Phone: 12-24                  |
| Lioret 2012<br>N = 542    | Australia | 18 months postpartum<br>General population                                       | Diet and exercise<br>Group                | Dietitian<br>Health centres                          | 15 months<br>In-person: 6                                  |
| Lovelady 2000<br>N = 48   | USA       | 4 weeks postpartum<br>BMI 25 to 30 kg/m <sup>2</sup>                             | Diet and exercise<br>Individual           | Trained research assistants<br>Home and study centre | 10 weeks<br>In-person: 40                                  |
| Lovelady 1995<br>N = 38   | USA       | 6 weeks postpartum<br>General population                                         | Exercise<br>Individual                    | Not reported<br>Centre-based                         | 12 weeks<br>In-person: 60                                  |
| Lovelady 2009<br>N = 24   | USA       | 3 weeks postpartum<br>BMI 20 to 30 kg/m <sup>2</sup>                             | Exercise<br>Individual                    | Research Assistants<br>Home                          | 16 weeks<br>In-person: 48                                  |
| Maturi 2011<br>N = 70     | Iran      | 6 weeks - 6 months postpartum<br>BMI > 19.8 and < 29 kg/m <sup>2</sup>           | Exercise<br>Individual                    | Researchers<br>Home and community                    | 12 weeks<br>In-person: 1;<br>Text message: 12;<br>Phone: 6 |
| McCrorry 1999<br>N = 68   | USA       | 12 ± 4 weeks postpartum                                                          | Diet and exercise<br>Individual           | Not reported<br>Location not reported                | 11 days                                                    |

|                           |           |                                                                                 |                                           |                                                                                |                                                   |
|---------------------------|-----------|---------------------------------------------------------------------------------|-------------------------------------------|--------------------------------------------------------------------------------|---------------------------------------------------|
|                           |           | General population                                                              |                                           |                                                                                |                                                   |
| McIntyre 2012<br>N = 28   | Australia | 6 weeks postpartum<br>Post gestational diabetes                                 | Exercise<br>Individual                    | Exercise physiologist<br>Home                                                  | 12 weeks<br>In-person: 1;<br>Phone: 8             |
| Nicklas 2014<br>N = 75    | USA       | 6 weeks postpartum<br>Post gestational diabetes                                 | Diet and exercise<br>Individual           | Licensed dietitian<br>Home                                                     | 12 months<br>Cannot be determined                 |
| Ostbye 2009<br>N = 450    | USA       | 6 weeks postpartum<br>Pre-pregnancy<br>BMI $\geq 25$ kg/m <sup>2</sup>          | Diet and exercise<br>Group and individual | Facilitators; Counsellor<br>Community and home                                 | 9 months<br>In-person: 18<br>Phone: 6             |
| O'Toole 2003<br>N = 40    | USA       | 6 weeks - 6 months postpartum<br>Pre-pregnancy<br>BMI 25-29.9 kg/m <sup>2</sup> | Diet and exercise<br>Group and individual | Dietitian and exercise physiologist<br>Research lab and home                   | Cannot be determined                              |
| Parsa 2017<br>N = 120     | Iran      | 3 - 20 days postpartum<br>General population                                    | Diet and exercise<br>Group                | Not reported<br>Health centres                                                 | 3 weeks<br>In-person: 3                           |
| Tripette 2014<br>N = 34   | Japan     | 3 months - 1 year postpartum<br>BMI $> 22$ kg/m <sup>2</sup>                    | Exercise<br>Individual                    | Wii Fit Plus game<br>Home                                                      | 40 days<br>In-person: 2                           |
| Wiltheiss 2012<br>N = 400 | USA       | Within 6 months postpartum<br>BMI $\geq 25$ kg/m <sup>2</sup>                   | Diet and exercise<br>Group and individual | Trained telephone counsellors and study nutritionists<br>Home and study centre | 8 months<br>In-person: 1;<br>Mail: 8;<br>Phone: 8 |

|                                 |          |                                                    |                                            |                                                             |                                                  |
|---------------------------------|----------|----------------------------------------------------|--------------------------------------------|-------------------------------------------------------------|--------------------------------------------------|
| Youngwanichsetha 2013<br>N = 69 | Thailand | 6 -12 weeks<br>postpartum<br>Type 2 diabetes       | Exercise<br>Individual                     | Not reported<br>Hospital for training and home for exercise | 12 weeks<br>In-person: 3                         |
| Zourladani 2015<br>N = 42       | Greece   | 4 - 6 weeks<br>postpartum<br>General<br>population | Exercise<br>Group                          | Fitness instructor<br>Centre                                | 12 weeks<br>In-person: 36                        |
| Zilberman et al. 2018           | Israel   | 3-4 months<br>postpartum<br>General<br>population  | Lifestyle<br>(diet/exercise)<br>Individual | Dietitian/sports instructor<br>Gym                          | 24 months<br>3 individual<br>sessions<br>4 group |

**Table S6.** Health literacy domains of lifestyle interventions in postpartum women.

| <b>Author</b>    | <b>Interacting with Healthcare Professionals</b> | <b>Access and Utilisation of Health Care</b> | <b>Self-care: Skills and Knowledge</b> | <b>Social Support or Enabler</b> | <b>Participating in Health Debates and Decision-making</b> |
|------------------|--------------------------------------------------|----------------------------------------------|----------------------------------------|----------------------------------|------------------------------------------------------------|
| Berry 2015       |                                                  |                                              | X                                      | X                                |                                                            |
| Bertz 2015       |                                                  |                                              | X                                      |                                  |                                                            |
| Colleran 2012    |                                                  |                                              | X                                      |                                  |                                                            |
| Craigie 2011     |                                                  |                                              | X                                      |                                  |                                                            |
| Daley 2015       | X                                                |                                              |                                        |                                  |                                                            |
| Davenport 2011   |                                                  |                                              | X                                      |                                  |                                                            |
| deRosset 2013    |                                                  |                                              | X                                      |                                  |                                                            |
| Dritsa 2009      |                                                  |                                              | X                                      |                                  |                                                            |
| Fjeldsoe 2010    |                                                  |                                              | X                                      | X                                |                                                            |
| Holmes 2018      |                                                  |                                              | X                                      |                                  |                                                            |
| Huang 2011       |                                                  |                                              | X                                      |                                  |                                                            |
| Huseinovic 2016  |                                                  |                                              | X                                      |                                  |                                                            |
| Keller 2014      | X                                                |                                              | X                                      | X                                |                                                            |
| Kernot 2019      |                                                  |                                              | X                                      |                                  |                                                            |
| Khodabandeh 2017 |                                                  |                                              | X                                      |                                  |                                                            |
| Krummell 2010    |                                                  |                                              | X                                      | X                                |                                                            |
| Leermakers 1998  |                                                  |                                              | X                                      | X                                |                                                            |
| Lioret 2012      |                                                  |                                              | X                                      | X                                |                                                            |
| Lovelady 2000    |                                                  |                                              | X                                      |                                  |                                                            |
| Lovelady 1995    |                                                  |                                              | X                                      |                                  |                                                            |
| Lovelady 2009    |                                                  |                                              | X                                      |                                  |                                                            |
| Maturi 2011      |                                                  |                                              | X                                      |                                  |                                                            |

|                               |   |   |   |
|-------------------------------|---|---|---|
| McCrary<br>1999               |   | X |   |
| McIntyre<br>2012              |   | X |   |
| Nicklas<br>2014               |   | X |   |
| Ostbye<br>2009                | X | X | X |
| O'Toole<br>2003               |   | X | X |
| Parsa<br>2017                 |   | X | X |
| Tripette<br>2014              |   | X |   |
| Wiltheiss<br>2013             |   | X | X |
| Youngw<br>anichset<br>ha 2013 |   | X |   |
| Zilberma<br>n 2018            |   | X |   |
| Zourdala<br>ni 2015           |   | X |   |
